# Supplementary material for: European Sea Bass (Dicentrarchus labrax) Immune Status and Disease Resistance Are Impaired by Arginine Dietary Supplementation
Source: PubMed Central journal article supplement (PMC4598043; doi:10.1371/journal.pone.0139967), 2015-10-08
Supplement: pone.0139967.s003.pdf [file pone.0139967.s003.pdf]

**European sea bass (*Dicentrarchus labrax*) immune status and disease resistance are impaired by arginine dietary supplementation**

Rita Azeredo<sup>1,2\*</sup>, Jaume Pérez-Sánchez<sup>4</sup>, Ariadna Sitjà-Bobadilla<sup>5</sup>, Belén Fouz<sup>6</sup>, Lluís Tort<sup>3</sup>, Cláudia Aragão<sup>7</sup>, Aires Oliva-Teles<sup>1,2</sup>, Benjamín Costas<sup>1\*</sup>

<sup>1</sup>Centro Interdisciplinar de Investigação Marinha e Ambiental (CIIMAR), Universidade do Porto, Rua dos Bragas 289, 4050-123 Porto, Portugal.

<sup>2</sup>Departamento de Biologia, Faculdade de Ciências da Universidade do Porto (FCUP), 4169-007 Porto, Portugal.

<sup>3</sup>Departament de Biologia Cel·lular, Fisiologia Animal i Immunologia, Universitat Autònoma de Barcelona, Bellaterra, Spain.

<sup>4</sup>Nutrigenomics and Fish Growth Endocrinology Group, Institute of Aquaculture Torre de la Sal, IATS-CSIC, 12595 Ribera de Cabanes , Castellón, Spain.

<sup>5</sup>Fish Pathology Group, Institute of Aquaculture Torre de la Sal, IATS-CSIC, 12595 Ribera de Cabanes , Castellón, Spain.

<sup>6</sup>Department of Microbiology and Ecology, Faculty of Biology, University of Valencia, Dr Moliner 50, 46100 Burjassot, Valencia, Spain.

<sup>7</sup>Centro de Ciências do Mar, Universidade do Algarve, Campus de Gambelas, edf. 7, 8005-139 Faro, Portugal

**\*Corresponding authors:**

Rita Azeredo

Benjamín Costas

Email addresses: [mleme@ciimar.up.pt](mailto:mleme@ciimar.up.pt); [bcostas@ciimar.up.pt](mailto:bcostas@ciimar.up.pt)

**Table A. Relative expression of genes involved in the immune response or arginine metabolism in the European sea bass spleen after 29 days of feeding trial.** Different letters denote significant differences between dietary treatments (One-way ANOVA;  $P < 0.05$ )

| Genes        | Diets                     |                           |                           | One-way ANOVA |
|--------------|---------------------------|---------------------------|---------------------------|---------------|
|              | CTRL                      | Arg1                      | Arg2                      |               |
| <i>ASL</i>   | 0.85 ± 0.056              | 1.10 ± 0.17               | 0.83 ± 0.077              | 0.21          |
| <i>ASS</i>   | 0.15 ± 0.02               | 0.18 ± 0.03               | 0.14 ± 0.02               | 0.33          |
| <i>ARG2</i>  | 0.19 ± 0.03               | 0.22 ± 0.03               | 0.24 ± 0.03               | 0.53          |
| <i>GATM</i>  | 0.18 ± 0.03 <sup>a</sup>  | 0.70 ± 0.19 <sup>b</sup>  | 0.11 ± 0.01 <sup>a</sup>  | 0.00          |
| <i>AMD1</i>  | 7.23 ± 0.84 <sup>a</sup>  | 5.92 ± 0.61 <sup>ab</sup> | 4.5 ± 0.37 <sup>b</sup>   | 0.01          |
| <i>ODC1</i>  | 0.5 ± 0.08                | 0.57 ± 0.08               | 0.49 ± 0.06               | 0.66          |
| <i>SAT1</i>  | 2.62 ± 0.33               | 2.8 ± 0.37                | 2.65 ± 0.46               | 0.95          |
| <i>SMOX</i>  | 0.3 ± 0.043 <sup>a</sup>  | 0.6 ± 0.07 <sup>b</sup>   | 0.33 ± 0.04 <sup>a</sup>  | 0.00          |
| <i>NOA1</i>  | 1.04 ± 0.04               | 1.29 ± 0.13               | 1.05 ± 0.12               | 0.21          |
| <i>NOXIN</i> | 0.25 ± 0.03               | 0.32 ± 0.07               | 0.26 ± 0.03               | 0.63          |
| <i>NOSIP</i> | 5.34 ± 0.44               | 5.15 ± 0.46               | 4.54 ± 0.5                | 0.46          |
| <i>IL1β</i>  | 0.04 ± 0.01               | 0.08 ± 0.01               | 0.06 ± 0.01               | 0.11          |
| <i>IL-8</i>  | 0.17 ± 0.06               | 0.3 ± 0.05                | 0.14 ± 0.03               | 0.23          |
| <i>IL-10</i> | 1.02 ± 0.08 <sup>a</sup>  | 1.52 ± 0.11 <sup>b</sup>  | 0.63 ± 0.06 <sup>c</sup>  | 0.00          |
| <i>IL-20</i> | 0.63 ± 0.06 <sup>a</sup>  | 0.6 ± 0.09 <sup>a</sup>   | 0.38 ± 0.02 <sup>b</sup>  | 0.03          |
| <i>IL-34</i> | 11.76 ± 1.85              | 12.88 ± 1.45              | 8.93 ± 1.47               | 0.25          |
| <i>TNF-α</i> | 0.80 ± 0.11               | 0.72 ± 0.13               | 0.54 ± 0.04               | 0.23          |
| <i>CCR3</i>  | 0.89 ± 0.10 <sup>a</sup>  | 1.56 ± 1.37 <sup>b</sup>  | 1.64 ± 0.13 <sup>b</sup>  | 0.00          |
| <i>CCR9</i>  | 1.29 ± 0.19               | 1.50 ± 0.26               | 1.25 ± 0.22               | 0.71          |
| <i>ACKR4</i> | 3.49 ± 0.26 <sup>a</sup>  | 3.64 ± 0.34 <sup>a</sup>  | 2.40 ± 0.25 <sup>b</sup>  | 0.01          |
| <i>CD247</i> | 3.27 ± 0.32               | 3.61 ± 0.36               | 2.78 ± 0.24               | 0.18          |
| <i>CD8b</i>  | 0.4 ± 0.05                | 0.38 ± 0.03               | 0.33 ± 0.04               | 0.40          |
| <i>MyD88</i> | 2.07 ± 0.15               | 2.53 ± 0.15               | 2 ± 0.19                  | 0.08          |
| <i>CD33</i>  | 45.17 ± 5.34 <sup>a</sup> | 69.77 ± 2.04 <sup>b</sup> | 40.92 ± 2.94 <sup>a</sup> | 0.00          |
| <i>CSF1R</i> | 6.91 ± 1.1                | 6.68 ± 0.64               | 5.71 ± 0.67               | 0.54          |
| <i>MIF</i>   | 2.5 ± 0.18                | 2.94 ± 0.29               | 2.81 ± 0.42               | 0.65          |
| <i>MMD</i>   | 0.65 ± 0.04               | 0.67 ± 0.06               | 0.63 ± 0.05               | 0.84          |
| <i>IRF8</i>  | 3.9 ± 0.45                | 4.21 ± 0.53               | 3.82 ± 0.43               | 0.84          |
| <i>NFKB2</i> | 10.46 ± 0.53              | 11.27 ± 1.25              | 11.01 ± 1.33              | 0.88          |

**Table B. Relative expression of genes involved in the immune response or arginine metabolism in the European sea bass anterior intestine after 29 days of feeding trial.** Different letters denote significant differences between dietary treatments (One-way ANOVA;  $P < 0.05$ )

| Genes                          | Diets                       |                           |                             | One-way ANOVA |
|--------------------------------|-----------------------------|---------------------------|-----------------------------|---------------|
|                                | CTRL                        | Arg1                      | Arg2                        |               |
| <i>ASL</i>                     | 2.26 ± 0.27                 | 2.48 ± 0.33               | 1.81 ± 0.24                 | 0.25          |
| <i>ASS</i>                     | 0.48 ± 0.05                 | 0.54 ± 0.02               | 0.51 ± 0.07                 | 0.81          |
| <i>ARG2</i>                    | 153.10 ± 16.55 <sup>a</sup> | 58.02 ± 5.71 <sup>b</sup> | 168.01 ± 16.81 <sup>a</sup> | 0.00          |
| <i>GATM</i>                    | 446.84 ± 99.70              | 526.85 ± 117.12           | 334.53 ± 59.24              | 0.33          |
| <i>AMD1</i>                    | 15.84 ± 1.83                | 16.76 ± 0.97              | 17.99 ± 1.51                | 0.59          |
| <i>ODC1</i>                    | 2.48 ± 0.46                 | 2.72 ± 0.77               | 2.18 ± 0.21                 | 0.75          |
| <i>SAT1</i>                    | 7.43 ± 0.79                 | 9.54 ± 1.00               | 7.84 ± 0.59                 | 0.19          |
| <i>SMOX</i>                    | 9.48 ± 2.46                 | 8.52 ± 2.16               | 7.56 ± 0.74                 | 0.74          |
| <i>NOA1</i>                    | 6.66 ± 0.55                 | 6.31 ± 0.66               | 6.35 ± 0.36                 | 0.88          |
| <i>NOXIN</i>                   | 0.85 ± 0.07                 | 0.71 ± 0.06               | 0.82 ± 0.05                 | 0.25          |
| <i>NOSIP</i>                   | 27.49 ± 2.69                | 26.90 ± 3.44              | 24.65 ± 1.07                | 0.72          |
| <i>IL-1<math>\beta</math></i>  | 0.25 ± 0.10                 | 0.24 ± 0.03               | 0.21 ± 0.03                 | 0.86          |
| <i>IL-8</i>                    | 0.61 ± 0.12                 | 0.67 ± 0.22               | 0.76 ± 0.11                 | 0.82          |
| <i>IL-10</i>                   | 1.03 ± 0.13 <sup>a</sup>    | 0.85 ± 0.08 <sup>ab</sup> | 0.64 ± 0.03 <sup>b</sup>    | 0.01          |
| <i>IL-20</i>                   | 0.84 ± 0.09                 | 0.98 ± 0.15               | 0.74 ± 0.09                 | 0.3           |
| <i>IL-34</i>                   | 2.97 ± 0.12 <sup>a</sup>    | 2.69 ± 0.10 <sup>ab</sup> | 2.41 ± 0.17 <sup>b</sup>    | 0.04          |
| <i>TNF-<math>\alpha</math></i> | 2.68 ± 0.27                 | 2.76 ± 0.26               | 2.24 ± 0.11                 | 0.21          |
| <i>CCR3</i>                    | 7.93 ± 1.17                 | 7.44 ± 1.08               | 7.02 ± 0.30                 | 0.77          |
| <i>CCR9</i>                    | 7.80 ± 0.64                 | 7.57 ± 0.89               | 7.07 ± 0.89                 | 0.83          |
| <i>ACKR4</i>                   | 43.22 ± 3.18 <sup>ab</sup>  | 50.03 ± 5.84 <sup>a</sup> | 30.84 ± 1.06 <sup>b</sup>   | 0.01          |
| <i>CD247</i>                   | 14.31 ± 0.46 <sup>a</sup>   | 16.86 ± 1.90 <sup>a</sup> | 10.74 ± 0.32 <sup>b</sup>   | 0.00          |
| <i>CD8b</i>                    | 1.33 ± 0.08                 | 1.02 ± 0.09               | 1.07 ± 0.12                 | 0.10          |
| <i>MyD88</i>                   | 16.89 ± 3.09                | 15.18 ± 1.03              | 14.24 ± 0.66                | 0.59          |
| <i>CD33</i>                    | 7.34 ± 0.80 <sup>a</sup>    | 7.15 ± 0.60 <sup>a</sup>  | 5.03 ± 0.47 <sup>b</sup>    | 0.03          |
| <i>CSF1R</i>                   | 6.50 ± 1.11                 | 6.09 ± 0.61               | 5.42 ± 0.38                 | 0.57          |
| <i>MIF</i>                     | 57.34 ± 6.70                | 52.65 ± 5.30              | 59.67 ± 4.69                | 0.69          |
| <i>MMD</i>                     | 49 ± 5.51                   | 52.47 ± 4.63              | 46.10 ± 3.62                | 0.62          |
| <i>IRF8</i>                    | 11.60 ± 1.98                | 11.48 ± 1.30              | 10.16 ± 0.60                | 0.7           |
| <i>NFKB2</i>                   | 24.98 ± 3.07                | 32.36 ± 1.63              | 27.98 ± 2.11                | 0.12          |

**Table C. Relative expression of genes involved in the immune response or arginine metabolism in the European sea bass posterior intestine after 29 days of feeding trial. Different letters denote significant differences between dietary treatments (One-way ANOVA; P < 0.05)**

| Genes        | Diets                     |                           |                            | One-way ANOVA |
|--------------|---------------------------|---------------------------|----------------------------|---------------|
|              | CTRL                      | Arg1                      | Arg2                       |               |
| <i>ASL</i>   | 6.13 ± 0.79               | 6.40 ± 0.66               | 7.44 ± 1.79                | 0.76          |
| <i>ASS</i>   | 1.52 ± 0.16               | 1.65 ± 0.21               | 1.46 ± 0.18                | 0.76          |
| <i>ARG2</i>  | 88.79 ± 4.26 <sup>a</sup> | 36.75 ± 9.06 <sup>b</sup> | 46.74 ± 5.18 <sup>b</sup>  | 0.00          |
| <i>GATM</i>  | 10.97 ± 4.80              | 76.46 ± 32.35             | 41.82 ± 21.13              | 0.26          |
| <i>AMD1</i>  | 36.00 ± 2.41              | 35.76 ± 4.16              | 34.73 ± 3.47               | 0.96          |
| <i>ODC1</i>  | 2.51 ± 0.49               | 2.48 ± 0.29               | 2.58 ± 0.23                | 0.98          |
| <i>SAT1</i>  | 14.80 ± 2.39              | 17.57 ± 2.33              | 14.65 ± 0.95               | 0.51          |
| <i>SMOX</i>  | 22.33 ± 3.67              | 27.62 ± 6.82              | 22.48 ± 5.49               | 0.75          |
| <i>NOA1</i>  | 9.06 ± 0.99               | 9.53 ± 1.23               | 9.36 ± 0.79                | 0.95          |
| <i>NOXIN</i> | 1.67 ± 0.24               | 1.50 ± 0.19               | 1.54 ± 0.10                | 0.78          |
| <i>NOSIP</i> | 41.45 ± 5.84              | 43.93 ± 5.46              | 38.90 ± 2.90               | 0.76          |
| <i>IL-1β</i> | 0.33 ± 0.09               | 0.33 ± 0.04               | 0.37 ± 0.05                | 0.85          |
| <i>IL-8</i>  | 1.32 ± 0.28               | 1.17 ± 0.41               | 1.46 ± 0.42                | 0.87          |
| <i>IL-10</i> | 1.11 ± 0.22               | 1.73 ± 0.27               | 1.22 ± 0.09                | 0.09          |
| <i>IL-20</i> | 1.57 ± 0.30               | 1.70 ± 0.19               | 1.29 ± 0.11                | 0.43          |
| <i>IL-34</i> | 7.41 ± 0.97               | 7.21 ± 0.70               | 6.02 ± 0.89                | 0.48          |
| <i>TNF-α</i> | 4.09 ± 0.82               | 4.24 ± 0.60               | 4.02 ± 0.42                | 0.97          |
| <i>CCR3</i>  | 15.38 ± 1.97              | 15.07 ± 2.38              | 12.67 ± 0.95               | 0.51          |
| <i>CCR9</i>  | 25.58 ± 3.30              | 37.18 ± 6.25              | 22.59 ± 3.10               | 0.06          |
| <i>ACKR4</i> | 62.32 ± 7.72              | 73.59 ± 11.05             | 51.16 ± 4.28               | 0.13          |
| <i>CD247</i> | 29.12 ± 2.76 <sup>a</sup> | 30.27 ± 1.56 <sup>a</sup> | 20.53 ± 1.68 <sup>b</sup>  | 0.00          |
| <i>CD8b</i>  | 2.61 ± 0.48               | 2.65 ± 0.69               | 1.89 ± 0.20                | 0.38          |
| <i>MyD88</i> | 26.13 ± 3.32              | 29.08 ± 2.67              | 24.75 ± 1.46               | 0.52          |
| <i>CD33</i>  | 16.74 ± 1.83              | 18.84 ± 3.19              | 12.74 ± 1.49               | 0.19          |
| <i>CSF1R</i> | 11.43 ± 1.70              | 8.99 ± 0.80               | 7.67 ± 0.91                | 0.11          |
| <i>MIF</i>   | 104.87 ± 9.33             | 94.40 ± 8.28              | 84.95 ± 4.47               | 0.22          |
| <i>MMD</i>   | 62.09 ± 11.07             | 50.56 ± 12.24             | 51.71 ± 10.24              | 0.75          |
| <i>IRF8</i>  | 13.24 ± 1.72              | 17.94 ± 2.77              | 15.85 ± 1.22               | 0.28          |
| <i>NFKB2</i> | 43.96 ± 7.18 <sup>a</sup> | 71.62 ± 8.83 <sup>a</sup> | 55.25 ± 4.31 <sup>ab</sup> | 0.04          |
